# The conserved transcription factor Mef2 has multiple roles in adult *Drosophila* musculature formation

Cedric Soler\*, Jun Han\* and Michael V. Taylor†

## SUMMARY

Muscle is an established paradigm for analysing the cell differentiation programs that underpin the production of specialised tissues during development. These programs are controlled by key transcription factors, and a well-studied regulator of muscle gene expression is the conserved transcription factor Mef2. In vivo, Mef2 is essential for the development of the *Drosophila* larval musculature: *Mef2*-null embryos have no differentiated somatic muscle. By contrast, a similar phenotype has not been seen in analyses of the function of *Mef2* genes in other examples of myogenesis. These include using conditional mutant mice, using morpholinos in zebrafish and using hypomorphic mutants in *Drosophila* adult development. However, we show here that *Mef2* is absolutely required for a diverse range of *Drosophila* adult muscle types. These include the dorso-longitudinal muscles (DLMs), the largest flight muscles, which are produced by tissue remodelling. Furthermore, we demonstrate that *Mef2* has temporally separable functions in this remodelling and in muscle maintenance. *Drosophila* adult muscles are multi-fibre and physiologically diverse, in common with vertebrate skeletal muscles, but in contrast to *Drosophila* larval muscles. These results therefore establish the importance of *Mef2* in multiple roles in examples of myogenesis that have parallels in vertebrates and are distinct from that occurring in *Drosophila* embryogenesis.

**KEY WORDS:** Mef2, Myogenesis, Remodelling, Muscle differentiation, *Drosophila*

## INTRODUCTION

Cell differentiation programs underpin the production of specialised tissues during development and are controlled by key transcription factors. Muscle is both one of the main paradigms for analysing cell differentiation programs and a major tissue. In muscle, the conserved transcription factor Mef2 has a prominent position for two main reasons. First, studies in mammalian cell culture showed that Mef2 factors cooperate with the MyoD family in the regulation of muscle gene expression and in myogenic activity (Black and Olson, 1998). Second, a role in muscle differentiation in vivo was shown in *Drosophila* through analysing its single *Mef2* gene in larval musculature development during embryogenesis (Lilly et al., 1995; Bour et al., 1995; Ranganayakulu et al., 1995). Most strikingly, *Mef2*-null mutants have no differentiated somatic muscle, the equivalent to vertebrate skeletal muscle, whereas different *Mef2* hypomorphic mutants have different amounts of residual muscle. This absolute requirement for *Mef2* in muscle differentiation led to it being used as an example for understanding how transcription factors control complex cell differentiation programs (Junion et al., 2005; Sandmann et al., 2006; Elgar et al., 2008).

*Drosophila* has two phases of myogenesis: the first produces the larval musculature during embryogenesis; the second produces the adult musculature during metamorphosis. In common with vertebrate skeletal muscles, but in contrast to those in *Drosophila* larvae, adult *Drosophila* muscles are multi-fibre, and physiologically and functionally distinct (Bate, 1993; Bernstein et

al., 1993; Taylor, 2006; Maqbool and Jagla, 2007). In the adult thorax, the largest muscles are the jump muscle or TDT, the leg muscles and the indirect flight muscles, which comprise two groups – the dorso-longitudinal muscles (DLMs) and the dorso-ventral muscles (DVMs) (Miller, 1950). The DVMs, TDT and leg muscles are formed de novo during metamorphosis from adult myoblasts associated with the imaginal discs. By contrast, the DLMs form through tissue remodelling (Fernandes et al., 1991).

In adult *Drosophila*, the first *Mef2* hypomorphic mutants tested had a reduced number of abnormally patterned DLMs (Ranganayakulu et al., 1995; Cripps and Olson, 1998; Nguyen et al., 2002). More recently, a study using a temperature-sensitive combination of *Mef2* alleles found that, under restrictive conditions, the DLMs, DVMs and TDT still form, although again the number of DLMs was reduced (Baker et al., 2005). It was concluded that adult myogenesis can proceed independently of *Mef2*. In vertebrates, *Mef2* functional analysis in vivo is complicated by the presence of multiple *Mef2* genes (a-d). However, a conditional knockout revealed that *Mef2c* functions in sarcomere assembly, although other aspects of muscle differentiation still occurred (Potthoff et al., 2007). Morpholinos against *Mef2c* plus *Mef2d* produced a related phenotype in zebrafish (Hinitz and Hughes, 2007). Together, these results question whether the absolute requirement of *Mef2* for myogenesis is restricted to *Drosophila* embryonic development.

Previously, we have found that the *Him* gene can result in no DLMs at the end of pupation (Soler and Taylor, 2009). As *Him* encodes an inhibitor of Mef2 activity (Liotta et al., 2007), this suggested that DLM development may in fact require *Mef2*. Here, we tested this directly and analysed the wider role of *Mef2* in adult *Drosophila* myogenesis by using RNAi to produce *Mef2* loss of function. Genetic analysis of adult *Drosophila* development has been transformed by the application of genome-wide transgenic RNAi libraries (Dietzl et al., 2007). This approach is effective in muscle and is especially useful for genes with earlier functions in

Cardiff School of Biosciences, Cardiff University, Museum Avenue, Cardiff CF10 3AX, UK.

\*These authors contributed equally to this work

†Author for correspondence (taylormv@cf.ac.uk)

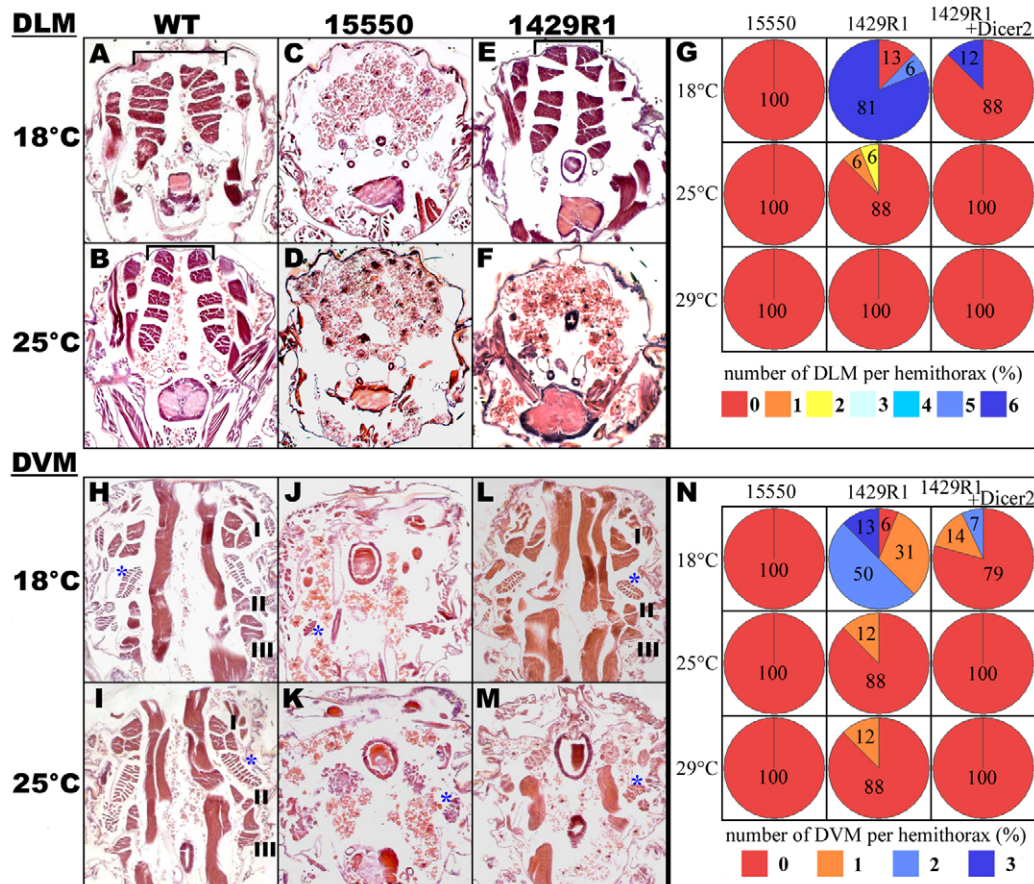

**Fig. 1. *Mef2* is required for *Drosophila* adult fibrillar muscles.** Wax sections at 96h APF to visualise the DLMs and DVMs in wild type (WT), and *1151Gal4>UASMef2RNAi*(15550) or *UASMef2RNAi*(1429R-1) at 18°C and 25°C. (A–F) DLMs (square bracket). Dorsal is uppermost. (H–M) DVMs. The three groups of DVM fibres are indicated (I, II, III) as is the TDT (asterisk). Anterior uppermost. (G,N) Quantitative analysis of the effect of *1151Gal4>UASMef2RNAi*(15550) or *UASMef2RNAi*(1429R-1) and *1151Gal4;>UASDicer2>UASMef2RNAi*(1429R-1) at 18°C, 25°C and 29°C on DLM number (G) and DVM number (N). Percentages for each muscle number are shown. At least 32 hemithoraces were analysed for each condition. Images for 29°C are in supplementary material Fig. S1.

embryogenesis (Schnorrer et al., 2010). We used this tool to control the place, extent and timing of gene function knockdown and show that adult *Drosophila* myogenesis cannot proceed independently of *Mef2*. Rather, it is absolutely required for a diverse range of muscle types. These include the DLMs for which we show *Mef2* is required for both their remodelling and to prevent their degeneration.

## MATERIALS AND METHODS

### *Drosophila* stocks, crosses and sample preparation

The following *Drosophila* stocks were used: *1151-Gal4* (Anant et al., 1998), *1151-Gal4;Mhc-tauGFP* (Soler et al., 2004), *Mef2<sup>65</sup>/CyOtwiGal4UAS-2xEGFP*, *Mef2<sup>113</sup>/CyOtwiGal4UAS-2xEGFP* (Elgar et al., 2008), *Mef2<sup>30-5</sup>/CyOKrGFP*, *Mef2<sup>44-5</sup>/CyOKrGFP* (Baker et al., 2005), *TubGal80<sup>ts</sup>*, *UASRab-RP4DN* (Bloomington stock centre), *UASRab-RP4RNAi* and *UASDicer2* (Dietzl et al., 2007). The *UASMef2RNAi* lines were 15550 and 15549 (Dietzl et al., 2007), and 1429R-1 and 1429R-3 (NIG). *1151-Gal4;Mhc-tauGFP* was the control and the driver for all experiments except those with *Gal80<sup>ts</sup>*, which used *1151-Gal4*. Egg collection and culture was at 25°C (unless otherwise stated). All pupal ages are hours after pupa formation (APF) equivalent to the time of development at 25°C.

*1151Gal4;>UASMef2RNAi/TubGal80<sup>ts</sup>* eggs were collected at 25°C and transferred to a permissive temperature, 19°C, until L2. Larvae were then shifted to 30°C, a restrictive temperature for *Gal80<sup>ts</sup>*, until 13.5h APF (equivalent to 20h APF at 25°C) and then ‘down-shifted’ to the permissive temperature (19°C). *Mef2<sup>30-5</sup>/Mef2<sup>44-5</sup>* progeny were selected from a cross of *Mef2<sup>30-5</sup>/CyOKrGFP* × *Mef2<sup>44-5</sup>/CyOKrGFP* and switched to the

restrictive temperature as described (Baker et al., 2005). *Mef2<sup>65</sup>/Mef2<sup>113</sup>* progeny were selected from a cross of *Mef2<sup>65</sup>/CyOtwiGal4UAS-2xEGFP* × *Mef2<sup>113</sup>/CyOtwiGal4UAS-2xEGFP*.

Tissue preparation and microscopic analysis for thoracic and leg muscles were essentially as previously described (Soler et al., 2004; Soler and Taylor, 2009).

## RESULTS AND DISCUSSION

### *Mef2* is required for adult fibrillar muscles

We used *1151-Gal4* to drive expression of *UASMef2RNAi*(15550) in the adult myoblasts of second instar larvae and then continuing throughout adult myogenesis (Anant et al., 1998; Soler et al., 2004). Normally, there are six DLMs in each hemithorax at the end of pupal life. By contrast, this RNAi-induced *Mef2* loss-of-function resulted in the complete absence of DLMs at 96h APF (Fig. 1A–D). An independent *UASMef2RNAi* construct (1429R-1) also had this effect (Fig. 1E,F,G). At 18°C there were six DLMs in ~80% of examples, but at increased temperature there were again no DLMs; in nearly 90% of examples at 25°C, and in 100% at 29°C. This is consistent with the temperature-dependent activity of the *Gal4/UAS* system, which results in higher levels of UAS gene expression at higher temperature (Brand et al., 1994). We assume that the 1429R-1 line expresses *Mef2RNAi* at a lower level than the 15550 line. Provision of *Dicer2*, a component of the RNAi



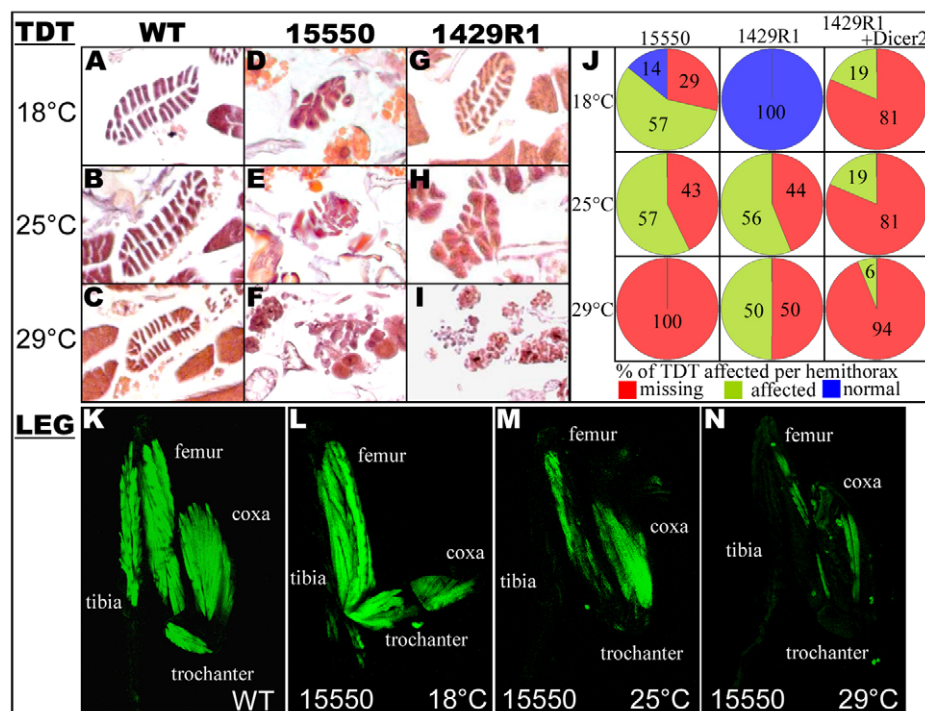

**Fig. 2. *Mef2* is required for *Drosophila* adult tubular muscles.** (A–I) Wax sections at 96h APF to visualise the TDT in wild type (WT), and *1151Gal4>UASMef2RNAi(15550)* or *UASMef2RNAi(1429R-1)* at 18°C, 25°C and 29°C. (J) Quantitative analysis of the effect of *1151Gal4>UASMef2RNAi(15550)* or *UASMef2RNAi(1429R-1)* and *1151Gal4;>UASDicer2>UASMef2RNAi(1429R-1)*. At least 32 hemithoraces were analysed for each condition. (K–N) Confocal micrographs visualizing the leg muscles using Mhc-GFP in wild type and *1151Gal4>UASMef2RNAi(15550)* at 18°C, 25°C and 29°C. *UASMef2RNAi(1429R-1)* gave a similar, but weaker, phenotype (supplementary material Fig. S2).

machinery that can enhance the transgenic RNAi effect (Dietzl et al., 2007), also enhances the phenotype so that at 18°C there were no DLMs in nearly all cases (Fig. 1G).

We found that *Mef2* is also required for the DVMs, the second major group of fibrillar thoracic muscles, which develop de novo, rather than by remodelling like the DLMs (Fig. 1H–N). Either *Mef2RNAi 15550* or *1429R-1* can result in the complete absence of these muscles at the end of pupation. As with the DLMs, the *1429R-1* line required a higher temperature, or *Dicer2*, to give this strong phenotype.

### ***Mef2* is required for adult tubular muscles**

A structurally and physiologically distinct thoracic muscle is the jump muscle or TDT (Peckham et al., 1990). It is a tubular muscle with fibres organised around a central lumen. We found it also requires *Mef2* (Fig. 2A–J). Its organisation is affected in the weaker *Mef2RNAi*-induced *Mef2* loss-of-function conditions (Fig. 2D,E,H,J), but with the *15550* line at 29°C it was absent in all cases. We then investigated whether *Mef2* is required for the development of other tubular muscles, those of the leg, where pairs of multi-fibre muscles are organised around a central tendon (Soler et al., 2004). We monitored leg myogenesis using MhcGFP (Soler et al., 2004) and found it was affected by *Mef2* loss-of-function similarly to the TDT (Fig. 2K–N). Thus, with the *15550* line at 18°C there was some inhibition and this was greater at 25°C. At 29°C there was very little properly differentiated muscle. In most instances there was no MhcGFP in the tibia and in only a few fibres more proximally; in some there was no MhcGFP at all.

In summary, and in contrast to a previous conclusion (Baker et al., 2005), we found that *Mef2* is absolutely required for a diverse range of muscles. Significantly, these comprise structurally distinct muscles, both fibrillar and tubular in organisation, muscles that develop in radically different ways, through either remodelling or de novo assembly, and muscles with physiologically distinct properties. Furthermore, we note that tubular muscle may require less *Mef2* activity than does fibrillar muscle. This is suggested by the presence

of both the TDT and some leg muscles under conditions in which the DLMs and DVMs are absent, e.g. with *Mef2RNAi(15550)* at 25°C, and could be linked to the different genetic programs in fibrillar and tubular muscle (Schonbauer et al., 2011).

### **Muscle remodelling requires *Mef2***

DLM development begins shortly after pupal formation with remodelling of three muscles, the larval oblique muscles, in each hemithorax. These muscles resist the general histolysis of metamorphosis, then fuse with adult myoblasts and split to form the six DLM templates. In wild-type myogenesis, this splitting is described as starting at 14h APF and being complete by 20h APF (Fernandes et al., 1991). To assess thoroughly the effect of *Mef2* on this remodelling, we assayed the number of developing DLM fibres in serial wax sections at three time-points (22h, 26h and 30h APF). This approach demonstrated that muscle remodelling requires *Mef2* (Fig. 3). With *Mef2RNAi(15550)* at 25°C limited splitting produced averages of 3.6 fibres at 22h APF and 3.5 fibres at 26h APF, in contrast to the six in the control (Fig. 3J). In the stronger loss-of-function conditions of *Mef2RNAi(15550)* plus *Dicer2* at 29°C, splitting was almost completely inhibited (3.3 fibres at 26h APF, not shown).

This requirement for *Mef2* is consistent with the only previous observation of a *Mef2* phenotype during splitting in which the average DLM number at 23h in the *Mef2<sup>65</sup>/Mef2<sup>113</sup>* heteroallelic combination was approximately 3.7 (Cripps and Olson, 1998). However, only this single time-point was assessed during remodelling and so one could not exclude a delay in splitting, which we have seen under some *Mef2* loss-of-function conditions. We found an average of 4.3 fibres by 26h in *Mef2<sup>65</sup>/Mef2<sup>113</sup>* (Fig. 4).

### **A temporally separable function of *Mef2* in muscle maintenance**

Our findings suggest there may be temporally distinct functions for *Mef2* in adult myogenesis. We tested this by controlling expression of the *UASMef2RNAi* transgene using *Gal80<sup>ts</sup>*, a temperature-

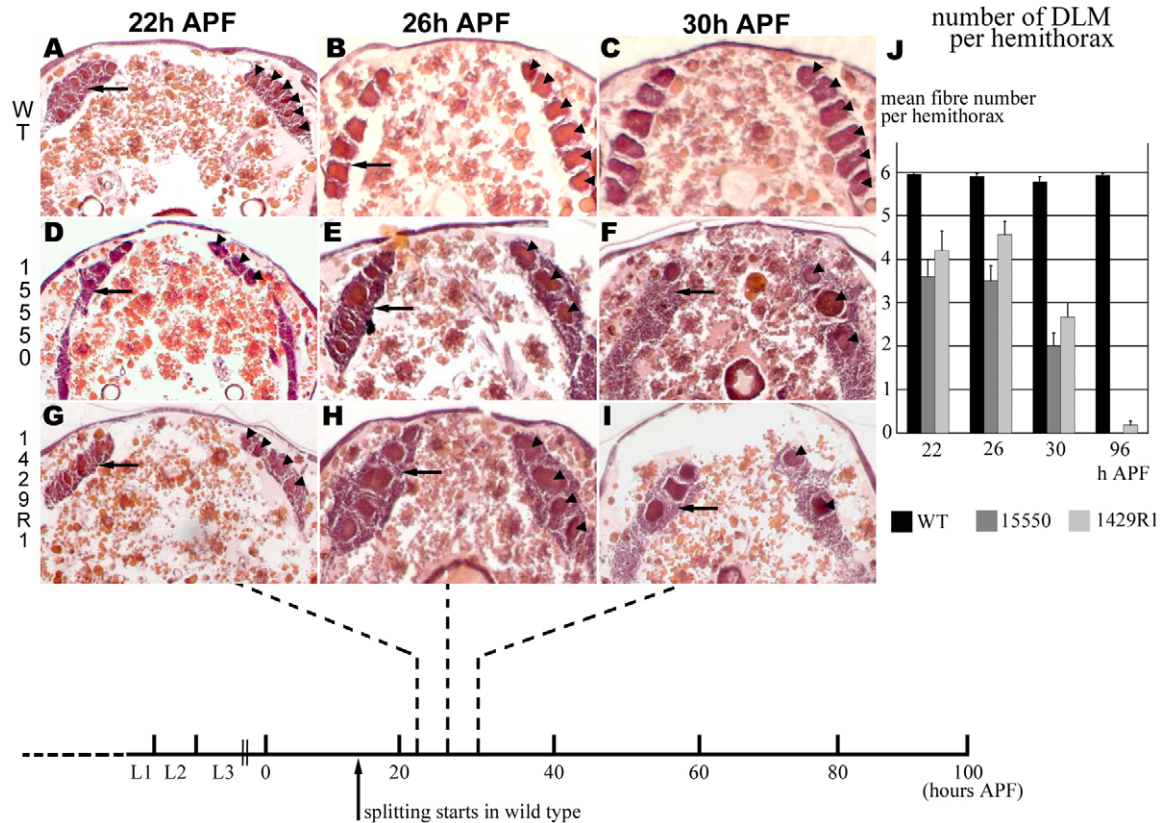

**Fig. 3. Muscle remodelling requires *Mef2*.** (A-I) Wax sections at three time-points during remodelling (22h, 26h and 30h APF) above a timeline of development in wild type (WT), and *1151Gal4>UAS*Mef2*RNAi(15550)* or *UAS*Mef2*RNAi(1429R-1)* at 25°C. The effect of *1429R-1* was again less strong than *15550*. Arrowheads indicate muscle fibres; arrows indicate unfused myoblasts. (J) Histogram showing the mean fibre number and s.e.m. for each condition (at least 10 hemithoraces analysed for each).

sensitive form of the Gal4-inhibitor Gal80 (McGuire et al., 2003; supplementary material Fig. S3). We undertook a 'down-shift' experiment. This produced *Mef2* loss of function during early adult myogenesis using a restrictive temperature for Gal80<sup>ts</sup> and restored function later at a permissive temperature. In this regime with *Mef2RNAi(15550)*, remodelling was inhibited with an average of 3.6 fibres at 26h APF, but rather than there being no muscles at 96h APF, there was an average of 2.2 (Fig. 4A-C). With the *1429R-1* line, averages were 4.3 and 2.2 fibres, respectively (Fig. 4C). Thus, restoring *Mef2* function during myogenesis indicates a temporally separable function for *Mef2* after remodelling in promoting muscle maintenance. This echoes the role of *Mef2* in regulating the expression of genes at different stages in the *Drosophila* embryonic muscle development program (Sandmann et al., 2006; Elgar et al., 2008).

The idea of temporally separable functions of *Mef2* is supported by our experiments without Gal80<sup>ts</sup> that show that *Mef2* is required to prevent the degeneration of split, as well as un-split, DLM templates. Thus, in the milder *Mef2* loss-of-function conditions of *Mef2RNAi(1429R-1)* at 25°C, full splitting as indicated by six fibres at 26h APF is seen in 39% of cases (Fig. 3J and data not shown). However, these remodelled fibres then degenerate, as indicated by 88% of cases having no DLMs at 96h APF, and none having more than two (Fig. 1G). DLM fibre loss starts soon after splitting as the fibre number is already decreased by 30h APF (Fig. 3J). This is consistent with our previous findings with overexpression of the *Mef2*-inhibitor Him, which showed DLM

degeneration under way at 30h APF (Soler and Taylor, 2009). Remodelling and maintenance are important aspects of tissue biology. The functions for *Mef2* that we demonstrated in them may have implications for muscle repair.

### ***Mef2* point mutants and *Mef2* RNAi form an allelic series**

Previous observations of the first hypomorphic *Mef2* mutants tested and then on other alleles, including a temperature-sensitive combination, found a reduced number of DLMs at the end of pupation (Ranganayakulu et al., 1995; Cripps and Olson, 1998; Nguyen et al., 2002; Baker et al., 2005). Here, we confirmed that the average DLM number at 96h APF in both the previously described *Mef2<sup>65</sup>/Mef2<sup>113</sup>* and temperature-sensitive *Mef2<sup>30-5</sup>/Mef2<sup>44-5</sup>* heteroallelic combinations was approximately three (Fig. 4C). However, in both there were examples with more than three DLMs, implying that at least some template splitting occurs, and other examples with fewer than three DLMs, indicating that some muscle degeneration occurs.

To compare systematically the phenotype of these *Mef2* loss-of-function conditions to our *Mef2RNAi* analysis, we monitored the DLMs throughout their development at 22h, 26h, 30h and 96h APF. We found that, in both *Mef2<sup>65</sup>/Mef2<sup>113</sup>* and *Mef2<sup>30-5</sup>/Mef2<sup>44-5</sup>*, although template splitting is reduced, some does indeed occur. At 26h APF, the average DLM fibre number was 4.3 for *Mef2<sup>65</sup>/Mef2<sup>113</sup>* and 4.0 for *Mef2<sup>30-5</sup>/Mef2<sup>44-5</sup>* (Fig. 4C). This, together with our findings with *Mef2RNAi* and previously with the



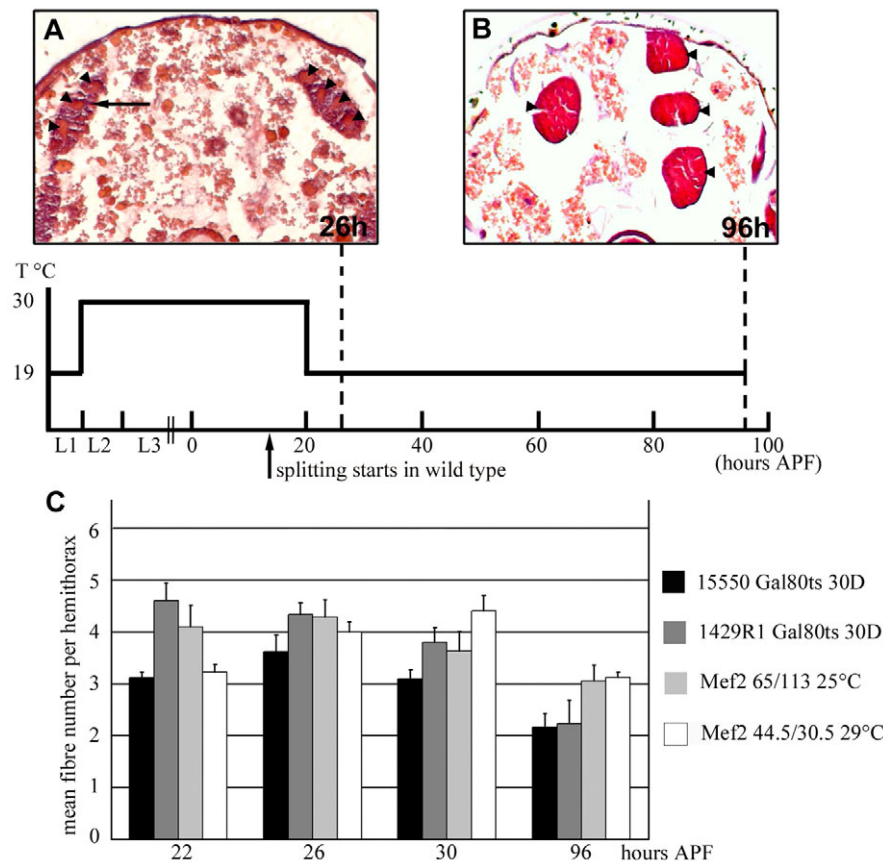

**Fig. 4. *Mef2* RNAi demonstrates temporally separable functions for *Mef2* and forms an allelic series with *Mef2* point mutation alleles.** (A, B) Wax sections at two time-points (26h and 96h APF) above a timeline of development showing the temperature shifts used to control *Mef2* RNAi expression in *1151 Gal4; UAS*Mef2* RNAi (15550)/TubGal80<sup>ts</sup>* larvae/pupae. Arrowheads indicate muscle fibres; arrows indicate unfused myoblasts. (C) Histogram comparing the mean fibre number and s.e.m. for 'down-shift' experiments (30D) using *Mef2* RNAi (15550 or 1429R-1) with *Mef2*<sup>65</sup>/*Mef2*<sup>113</sup> and *Mef2*<sup>30.5</sup>/*Mef2*<sup>44.5</sup> (at least eight hemithoraces analysed for each). Images for *Mef2*<sup>65</sup>/*Mef2*<sup>113</sup> and *Mef2*<sup>30.5</sup>/*Mef2*<sup>44.5</sup> are in supplementary material Fig. S4.

*Mef2*-inhibitor Him (Soler and Taylor, 2009), shows that the DLM number at the end of pupation depends on the extent of both remodelling and maintenance. Not separating effects on these two phenomena can confound analyses. For example, the route to three DLMs at 96h APF need not be no splitting followed by complete muscle maintenance.

Our quantitative assessment shows that the various *Mef2* loss-of-function conditions all inhibit splitting (Figs 3, 4) and can be placed in the following series: *Mef2* RNAi (15550) > *Mef2*<sup>65</sup>/*Mef2*<sup>113</sup>, *Mef2*<sup>30.5</sup>/*Mef2*<sup>44.5</sup> > *Mef2* RNAi (1429R1). However, the effect on the final DLM number is strikingly different. Whereas both RNAi conditions result in zero DLMs, the two heteroallelic combinations each result in approximately three DLMs. Significantly our 'down-shift' experiment demonstrates that *Mef2* RNAi can give a phenotype that resembles the heteroallelic combinations (Fig. 4). Splitting is substantially inhibited and muscles are maintained. We conclude that the various *Mef2* RNAi conditions and the existing *Mef2* mutants together comprise an allelic series and that the strong *Mef2* loss-of-function DLM phenotype is both an inhibition of remodelling and an absence of DLMs at the end of pupation. We rationalise previous work (Baker et al., 2005) by suggesting that in the *Mef2* heteroallelic combinations there is *Mef2* function that can efficiently activate muscle maintenance genes, but not those required for splitting. Differential gene activation in these alleles has been noted (Baker et al., 2005; Lovato et al., 2009).

Despite the prominence of *Mef2* among the transcription factors that regulate muscle gene expression (Black and Olson, 1998; Sandmann et al., 2006), muscle development during *Drosophila* embryogenesis has previously stood out as the only demonstration of *Mef2* loss of function that results in no muscle differentiation in

vivo. Therefore, our findings considerably extend the roles of *Mef2* and do so into types of myogenesis that have many parallels with vertebrate muscle development. It remains to be determined whether further similarities with respect to *Mef2* function will be uncovered in vertebrates through earlier and/or more complete knock-down of all relevant *Mef2* family members. Our results can be viewed alongside another study that was 'in press' when this paper was submitted (Bryantsev et al., 2012). It also found that one of the *Mef2* RNAi lines we used resulted in a lack of adult somatic muscles. Additionally, it reported unfused myoblasts around the DLMs and concluded that myoblast fusion requires *Mef2*. We too observed these unfused myoblasts (Fig. 3F,I). A role for *Mef2* during fusion is consistent with our previous finding that the *Mef2* inhibitor Him is downregulated just prior to fusion (Soler and Taylor, 2009).

As documented in the *Drosophila* embryo (Gunthorpe et al., 1999; Elgar et al., 2008), it may be that levels of *Mef2* activity also matter during the diverse events of adult myogenesis. Thus, there were conditions that had little effect on DLM remodelling but that resulted in their degeneration, that resulted in no fibrillar muscles while tubular muscles remained, or that affected distal leg muscles more than proximal. These effects, together with the range and temporal separation of processes affected, all highlight the multiple inputs of transcription factors such as *Mef2* that need to be understood to appreciate how complex cell differentiation programs are orchestrated.

#### Acknowledgements

We are grateful to Richard Cripps, the VDRC and the NIG-Fly and Bloomington Stock Centres for *Drosophila* stocks; to Anne Franke and Rebecca Callard for assistance in some experiments; and to Cardiff School of Biosciences Histology Unit.

### Funding

This research was supported by the European Union FP6 Network of Excellence 'MYORES' [LSHG-CT-2004-511978] and the John Ryder Memorial Trust.

### Competing interests statement

The authors declare no competing financial interests.

### Supplementary material

Supplementary material available online at

<http://dev.biologists.org/lookup/suppl/doi:10.1242/dev.077875/-DC1>

### References

- Anant, S., Roy, S. and VijayRaghavan, K. (1998). Twist and Notch negatively regulate adult muscle differentiation in *Drosophila*. *Development* **125**, 1361-1369.
- Baker, P. W., Tanaka, K. K., Klitgord, N. and Cripps, R. M. (2005). Adult myogenesis in *Drosophila melanogaster* can proceed independently of myocyte enhancer factor-2. *Genetics* **170**, 1747-1759.
- Bate, M. (1993). The mesoderm and its derivatives. In *The Development of Drosophila melanogaster* (ed. M. Bate and A. Martinez Arias), pp. 1013-1090. New York: Cold Spring Harbor Laboratory Press.
- Bernstein, S. I., O'Donnell, P. T. and Cripps, R. M. (1993). Molecular genetic analysis of muscle development, structure, and function in *Drosophila*. *Int. Rev. Cytol.* **143**, 63-152.
- Black, B. L. and Olson, E. N. (1998). Transcriptional control of muscle development by myocyte enhancer factor-2 (MEF2) proteins. *Annu. Rev. Cell Dev. Biol.* **14**, 167-196.
- Bour, B. A., O'Brien, M. A., Lockwood, W. L., Goldstein, E. S., Bodmer, R., Taghert, P. H., Abmayr, S. M. and Nguyen, H. T. (1995). *Drosophila* Mef2, a transcription factor that is essential for myogenesis. *Genes Dev.* **9**, 730-741.
- Brand, A., Manoukian, A. and Perrimon, N. (1994). Ectopic expression in *Drosophila*. *Methods Cell Biol.* **44**, 635-654.
- Bryantsev, A., Baker, P., Lovato, T., Jaramillo, M. and Cripps, R. (2012). Differential requirements for Myocyte Enhancer Factor-2 during adult myogenesis in *Drosophila*. *Dev. Biol.* **361**, 191-207.
- Cripps, R. M. and Olson, E. N. (1998). Twist is required for muscle template splitting during adult *Drosophila* myogenesis. *Dev. Biol.* **203**, 106-115.
- Dietzl, G., Chen, D., Schnorrer, F., Su, K. C., Barinova, Y., Fellner, M., Gasser, B., Kinsey, K., Oppel, S., Scheiblaue, S. et al. (2007). A genome-wide transgenic RNAi library for conditional gene inactivation in *Drosophila*. *Nature* **448**, 151-156.
- Elgar, S. J., Han, J. and Taylor, M. V. (2008). mef2 activity levels differentially regulate gene expression during *Drosophila* muscle development. *Proc. Natl. Acad. Sci. USA* **105**, 918-923.
- Fernandes, J., Bate, M. and Vijayraghavan, K. (1991). Development of the indirect flight muscles of *Drosophila*. *Development* **113**, 67-77.
- Gunthorpe, D., Beatty, K. E. and Taylor, M. V. (1999). Different levels, but not different isoforms, of the *Drosophila* transcription factor DMEF2 affect distinct aspects of muscle differentiation. *Dev. Biol.* **215**, 130-145.
- Hinits, Y. and Hughes, S. M. (2007). Mef2s are required for thick filament formation in nascent muscle fibres. *Development* **134**, 2511-2519.
- Junion, G., Jagla, T., Duplant, S., Tapin, R., Da Ponte, J. P. and Jagla, K. (2005). Mapping Dmef2-binding regulatory modules by using a ChIP-enriched in silico targets approach. *Proc. Natl. Acad. Sci. USA* **102**, 18479-18484.
- Lilly, B., Zhao, B., Ranganayakulu, G., Paterson, B. M., Schulz, R. A. and Olson, E. N. (1995). Requirement of Mads Domain Transcription Factor D-Mef2 for muscle formation in *Drosophila*. *Science* **267**, 688-693.
- Liotta, D., Han, J., Elgar, S., Garvey, C., Han, Z. and Taylor, M. V. (2007). The Him gene reveals a balance of inputs controlling muscle differentiation in *Drosophila*. *Curr. Biol.* **17**, 1409-1413.
- Lovato, T. L., Adams, M. M., Baker, P. W. and Cripps, R. M. (2009). A molecular mechanism of temperature sensitivity for mutations affecting the *Drosophila* muscle regulator myocyte enhancer factor-2. *Genetics* **183**, 107-117.
- Maqbool, T. and Jagla, K. (2007). Genetic control of muscle development: learning from *Drosophila*. *J. Muscle Res. Cell Motil.* **28**, 397-407.
- McGuire, S. E., Le, P. T., Osborn, A. J., Matsumoto, K. and Davis, R. L. (2003). Spatiotemporal rescue of memory dysfunction in *Drosophila*. *Science* **302**, 1765-1768.
- Miller, A. (1950). The internal anatomy and histology of the imago of *Drosophila melanogaster*. In *Biology of Drosophila* (ed. M. Demerec), pp. 420-534. New York, NY: John Wiley & Sons.
- Nguyen, T., Wang, J. and Schulz, R. A. (2002). Mutations within the conserved MADS box of the D-MEF2 muscle differentiation factor result in a loss of DNA binding ability and lethality in *Drosophila*. *Differentiation* **70**, 438-446.
- Peckham, M., Molloy, J., Sparrow, J. C. and White, D. C. (1990). Physiological properties of the dorsal longitudinal flight muscle and the tergal depressor of the trochanter muscle of *Drosophila melanogaster*. *J. Muscle Res. Cell Motil.* **11**, 203-215.
- Potthoff, M. J., Arnold, M. A., McAnally, J., Richardson, J. A., Bassel-Duby, R. and Olson, E. N. (2007). Regulation of skeletal muscle sarcomere integrity and postnatal muscle function by Mef2c. *Mol. Cell. Biol.* **27**, 8143-8151.
- Ranganayakulu, G., Zhao, B., Dokidis, A., Molkentin, J. D., Olson, E. N. and Schulz, R. A. (1995). A series of mutations in the D-MEF2 transcription factor reveal multiple functions in larval and adult myogenesis in *Drosophila*. *Dev. Biol.* **171**, 169-181.
- Sandmann, T., Jensen, L. J., Jakobsen, J. S., Karzynski, M. M., Eichenlaub, M. P., Bork, P. and Furlong, E. E. (2006). A temporal map of transcription factor activity: mef2 directly regulates target genes at all stages of muscle development. *Dev. Cell* **10**, 797-807.
- Schnorrer, F., Schonbauer, C., Langer, C. C., Dietzl, G., Novatchkova, M., Schernhuber, K., Fellner, M., Azaryan, A., Radolf, M., Stark, A. et al. (2010). Systematic genetic analysis of muscle morphogenesis and function in *Drosophila*. *Nature* **464**, 287-291.
- Schonbauer, C., Distler, J., Jahrling, N., Radolf, M., Dodt, H., Frasch, M. and Schnorrer, F. (2011). Spalt mediates an evolutionarily conserved switch to fibrillar muscle fate in insects. *Nature* **479**, 406-409.
- Soler, C. and Taylor, M. V. (2009). The Him gene inhibits the development of *Drosophila* flight muscles during metamorphosis. *Mech. Dev.* **126**, 595-603.
- Soler, C., Daczewska, M., Da Ponte, J. P., Dastugue, B. and Jagla, K. (2004). Coordinated development of muscles and tendons of the *Drosophila* leg. *Development* **131**, 6041-6051.
- Taylor, M. V. (2006). Comparison of muscle development in *Drosophila* and vertebrates. In *Muscle Development in Drosophila* (ed. H. Sink), pp. 169-203. Austin, TX: Landes Bioscience.
